# Supplementary material for: Chinese Herbal Medicines for Rheumatoid Arthritis: Text‐Mining the Classical Literature for Potentially Effective Natural Products
Source: Hindawi journal article supplement (doi:10.1155/2020/7531967), 2020-01-01
Supplement: f1 [file 7531967.f1.pdf]

# Chinese herbal medicines for Rheumatoid Arthritis: text-mining the Classical literature for potentially effective natural products

Xuan Xia<sup>1,2</sup>, Brian H May<sup>3</sup>, Anthony Lin Zhang<sup>3</sup>, Xinfeng Guo<sup>1,2</sup>, Chuanjian Lu<sup>1,2</sup>, Charlie C. Xue<sup>1,3</sup>, Qingchun Huang<sup>1,2</sup>

Affiliation

1. The Second Clinical College of Guangzhou University of Chinese Medicine, Guangzhou, China
2. Department of Rheumatology and Immunology, Guangdong Provincial Hospital of Chinese Medicine, Guangzhou, China.
3. China-Australia International Research Centre for Chinese Medicine, RMIT University, Bundoora, Victoria, Australia.

## Supplementary materials

**TABLE SUPP 1: Frequency of citations for formula interventions identified by the search terms at different stages in the selection procedure**

| Search term in pin yin | Search term in Chinese | All data (after duplicate removal) | Included citations | Earliest dynasty | Earliest Book                  |
|------------------------|------------------------|------------------------------------|--------------------|------------------|--------------------------------|
| 1: Bi                  | 痹                      | 2147                               | 258                | Dong han dynasty | <i>Jin Gui Yao Lue</i>         |
| 2: Li jie              | 历节                     | 473                                | 175                | Song dynasty     | <i>Tai Ping Sheng Hui Fang</i> |
| 3: Tong feng           | 痛风                     | 363                                | 89                 | Song dynasty     | <i>Ren Zhai Zhi Zhi Fang</i>   |
| 4: He xi feng          | 鹤膝风                    | 150                                | 14                 | Song dynasty     | <i>Sheng Ji Zong Lu</i>        |
| 5: Bai hu bing         | 白虎病                    | 11                                 | 5                  | Ming dynasty     | <i>Yi Xue Gang mu</i>          |
| 6: Ji zhua feng        | 鸡爪风                    | 11                                 | 2                  | Yuan dynasty     | <i>Ren Shu Bian Lan</i>        |
| 7: Gu chui feng        | 鼓槌风                    | 9                                  | 3                  | Ming dynasty     | <i>Sun Wen Heng Yi An</i>      |
| 8: Wang                | 尪                      | 10                                 | 2                  | Qing dynasty     | <i>Yi Zong Jin Jian</i>        |
| Total                  |                        | 3174                               | 548                |                  |                                |

**SUPP 2: Glossary of Pin yin, Chinese and scientific names for traditional medicines, books, formulas and other terms cited in the text and tables**

*Ben Cao Pin Hui Jing Yao* 本草品汇精要 (c. 1505), book name

*Ben Cao Gang Mu* 本草纲目 (c. 1593), book name

Bai fu ling 白茯苓, *Poria cocos* (Schw.) Wolf [sclerotium] (see Table 3)

bai hu bing 白虎病, disease name ‘white tiger disease’

bai hu li jie 白虎历节, disease name ‘white tiger joint disease’

Bai shao yao 白芍药 *Paeonia lactiflora* Pall. [radix] (see Table 3)

Bai zhu 白术, *Atractylodes macrocephala* Koidz [rhizome] (see Table 3)

Bai zhi 白芷, *Angelica dahurica* Fisch. ex Hoffm. Benth. et Hook. f [root] (see Table 3)

bi 痹, disease name ‘arthritis’ ‘painful obstruction’

Cao wu 草乌, *Aconitum kusnezoffii* Reichb. [root] (see Table 3)

Chuan niu xi 川牛膝, *Cyathula officinalis* Kuan [root] (see Table 3)

Chuan wu 川乌, *Aconitum carmichaelii* Debx [mother root]

Cang zhu 苍术, *Atractylodes lancea* Thunb. DC [rhizome] (see Table 3)

Chen pi 陈皮, *Citrus reticulata* Blanco [skin, peel] (see Table 3)

Chi fu ling 赤茯苓, *Poria cocos* (Schw.) Wolf [sclerotium] (see Table 3)

Chi shao yao 赤芍药 *Paeonia lactiflora* Pall. [radix] (see Table 3)

Chuan xiong 川芎, *Ligusticum wallichii* Franch [root] (see Table 3)

Dang gui 当归, *Angelica sinensis* Oliv. Diels [root] (see Table 3)

Dan dou chi 淡豆豉, *Glycine max* L. Merr [seed]

Da qiang huo tang 大羌活汤: formula name (see Table 2)

Da qin jiao tang 大秦芎汤: formula name (see Table 4)

Dang gui nian tong tang 当归拈痛汤: formula name (see Table 4)

Da zao 大枣, *Ziziphus jujuba* Mill [fruit]

Di huang 地黄, *Rehmannia glutinosa* Libosch. [root] (see Table 3)

Du huo ji sheng tang 独活寄生汤: formula name (see Table 4)

Du huo 独活, *Angelica pubescens Maxim. f. biserrata* Shan et Yuan [root] (see Table 3)

Da fu zi 大附子, *Aconitum carmichaelii* Debx. [root] (see Table 3)

Er miao san 二妙散: formula name (see Table 4)

Er chen tang 二陈汤: formula name (see Table 4)

Fu zi 附子, *Aconitum carmichaelii* Debx [processed root] (see Table 3)

Fang feng 防风, *Saposhnikovia divaricata* Turcz. Schischk [root] (see Table 3)

Fang ji huang qi tang 防己黄芪汤: formula name (see Table 2)

Fang ji 防己, *Stephania tetrandra* S. Moore [caulis] (see Table 3)

Fu shen 茯神, *Poria cocos* (Schw.) Wolf, [sclerotium] (see Table 3)

Fu ling 茯苓, *Poria cocos* Schw. Wolf [sclerotium] (see Table 3)

Fu zi ba wu tang 附子八物汤: formula name (see Table 2)

Gui pi tang 归脾汤: formula name (see Table 4)

Gan cao 甘草, *Glycyrrhiza uralensis* Fisch [root] (see Table 3)

Gan cao fu zi tang 甘草附子汤: formula name (see Table 2)

Gan di huang 干地黄, *Rehmannia glutinosa* Libosch. [root] (see Table 3)

gu chui feng 鼓椎风, disease name ‘drum stick wind’

Gui zhi 桂枝, *Cinnamomum cassia* Presl [twig] (see Table 3)

Gui xin 桂心, *Cinnamomum cassia* Presl [bark]

Gui zhi shao yao zhi mu tang 桂枝芍药知母汤: formula name (see Table 2)

Gan jiang 干姜, *Zingiber officinale* Rosc [rhizome]

Ge Zhi Yu Lun 格致余论 (c.1347) book name

he xi feng 鹤膝风, disease name ‘crane knee wind’

He xue san tong tang 和血散痛汤: formula name

Han fang ji 汉防己, *Stephania tetrandra* S. Moore [caulis] (see Table 3)

Huai niu xi 怀牛膝, *Achyranthes bidentata* Bl [root] (see Table 3)

Huang qi gui zhi wu wu tang 黄芪桂枝五物汤: formula name (see Table 4)

Hou pu 厚朴, *Magnolia officinalis* Rehd. et Wils; *M. officinalis* Rehd. et Wils. var. *biloba* Rehd. et Wils [Cortex]

Huang qi 黄芪, *Astragalus membranaceus*. Fisch. Bge. var. *mongholicus* Bge.Hsiao [root] (see Table 3)

Huang bai 黄柏, *Phellodendron chinense* Schneid [cortex] (see Table 3)

Huang qin 黄芩, *Scutellaria baicalensis* Georgi [root] (see Table 3)

Jiang 姜, *Zingiber officinale* Rosc. [rhizome] (see Table 3)

*Jin Gui Yao Lue Fang Lun* 金匱要略方论 (c. 206) book name

Jie geng 桔梗, *Platycodon grandiflorum* Jacq. A. DC [root]

ji zhua feng 鸡爪风, disease name ‘chicken’s claw wind’

Juan bi tang 蠲痹汤: formula name (see Table 4)

*Jing Shi Zheng Lei Da Guan Ben Cao* 经史证类大观本草 (c. 1108) book name

Lei feng shi guan jie yan 类风湿关节炎: rheumatoid arthritis

*Lei Zheng Zhi Cai* 类证治裁 (c.1839) book name

Lei gong teng 雷公藤, *Tripterygium wilfordii* Hook F [all parts]

li jie (bing) 历节(病), disease name ‘joint disease’

li jie feng 历节风, disease name ‘joint wind’, ‘articular wind’

Long dan 龙胆, *Gentiana manshurica* Kitage; *G. scabra* Bge; *G. triflora* Pall; *G. rigescens* Franch [rhizome]

Ma huang 麻黄, *Ephedra sinica* Stapf; *E. equisetina* Bge; *E. intermedia* Schrenk et C.A. Mey [aerial parts] (see Table 3)

*Mi Zhuan Zheng Zhi Yao Jue Ji Lei Fang* 秘传证治要诀及类方 (c.1443) book name

Ma huang fu zi xi xin tang 麻黄附子细辛汤: formula name (see Table 4)

Mu fang ji 木防己, *Cocculus orbiculatus* (L.) DC. [root]

Niu bang zi san 牛蒡子散: formula name (see Table 2)

Niu xi 牛膝, *Achyranthes bidentata* Bl [root] (see Table 3)

Niu bang zi 牛蒡子, *Arctium lappa* L [fructus] (see Table 3)

Pao jiang 炮姜, *Zingiber officinale* Rosc. [processed rhizome] (see Table 3)

Pao tian xiong 炮天雄, *Aconitum carmichaelii* Debx [processed root] (see Table 3)

*Pu Ji Fang* 普济方 (c.1406) book name: ‘Prescriptions for Universal Relief’

Qin jiao tang 秦艽汤: formula name (see Table 4)

Qiang huo sheng shi tang 羌活胜湿汤: formula name (see Table 4)

Quan xie 全蝎, *Buthus martensii* Karsch [scorpio]

Qiang huo 羌活, *Notopterygium incisum* Ting [root and rhizome] (see Table 3)

Qing feng teng 青风藤, *Sinomenium acutum* (Thunb.) Rehd. et Wils [caulis] (see Table 3)

Qin jiao 秦艽, *Gentiana macrophylla* Pall; *G. straminea* Maxim; *G. crassicaulis* Duthie ex Burk; *G. dahurica* Fisch [root] (see Table 3)

Ren shen 人参, *Panax ginseng* C. A. Mey [root] (see Table 3)

Rou gui 肉桂, *Cinnamomum cassia* Presl [cortex] (see Table 3)

San bi tang 三痹汤: formula name (see Table 4)

Sheng di huang 生地黄, *Rehmannia glutinosa* Libosch. [root] (see Table 3)

Sheng fu zi 生附子, *Aconitum carmichaelii* Debx [root] (see Table 3)

Sheng gan cao 生甘草, *Glycyrrhiza uralensis* Fisch [root] (see Table 3)

Shu di huang 熟地黄, *Rehmannia glutinosa* Libosch. [processed root] (see Table 3)

Shu fu zi 熟附子, *Aconitum carmichaelii* Debx [processed root] (see Table 3)

Si shen jian 四神煎: formula name (see Table 4)

Shen tong zhu yu tang 身痛逐瘀汤: formula name (see Table 4)

Shi quan da bu tang 十全大补汤: formula name (see Table 4)

*Shi Zheng Lei Da Guan Ben Cao* 经史证类大觀本草 (ca. 1108) book name

Shao yao 芍药, *Paeonia lactiflora* Pall [root] (see Table 3)

Sheng jiang 生姜, *Zingiber officinale* Rosc [rhizome] (see Table 3)

Si wu tang 四物汤: formula name (see Table 2)

Sheng di huang 生地黄, *Rehmannia glutinosa* Libosch [radix] (see Table 3)

Sheng jiang 生姜, *Zingiber officinale* Rosc. [rhizome] (see Table 3)

Shuang he tang 双合汤: formula name (see Table 4)

Tai qiong 台芎, *Ligusticum wallichii* Franch [root] (see Table 3)

Tao hong yin 桃红饮: formula name (see Table 4)

Tao ren 桃仁, *Prunus persica* L. Batsch [seed] (see Table 3)

tong feng 痛风, disease name ‘painful wind’

wang 尪, disease name ‘lameness’

Wu tou 乌头, *Aconitum carmichaelii* Debx; *A. kusnezoffii* Reichb. [radix] (see Table 3)

Wu tou tang 乌头汤: formula name (see Table 2)

Wu ji san 五积散: formula name (see Table 2)

Wei ling xian 威灵仙, *Clematis chinensis* Osbeck; *C. hexapetala* Pall; *C. manshurica* Rupr [rhizome] (see Table 3)

Xiong qiong 芎藭, *Ligusticum wallichii* Franch [root] (see Table 3)

Xuan bi tang 宣痹汤: formula name (see Table 4)

*Yi Fang Xuan Yao* 医方选要 (c.1495)

*Yi Xue Gang Mu* 医学纲目 (c. 1565): book name ‘Compendium of Medicine’

*Zheng Yin Mai Zhi* 症因脉治 (c.1641) book name

Zhi gan cao 炙甘草, *Glycyrrhiza uralensis* Fisch [processed root] (see Table 3)

Zhi ke 枳壳, *Citrus aurantium* L [fructus]

Zhi mu 知母, *Anemarrhena asphodeloides* Bge [rhizome]

zhong feng 中风, 'wind stroke'

*Zhong Hua Ben Cao* 中华本草 (1999) book name

*Zhong Hua Yi Dian* 中华医典 book name: 'Encyclopaedia of Traditional Chinese Medicine'

*Zhong Yao Da Ci Dian* 中药大辞典 book name: 'Great Compendium of Chinese Medicines'

**TABLE SUPP 3: Traditional properties of the most frequent herbs – channel tropism, flavour, nature**

| Herb name <sup>1</sup>   | Channel tropism <sup>5</sup> |           |            |             |          |            |             |                     |                      |                        | Flavour <sup>5</sup> |            |           |             |           |           | Nature <sup>5</sup> |          |          | Ref.<br>1 | Page<br>no. |
|--------------------------|------------------------------|-----------|------------|-------------|----------|------------|-------------|---------------------|----------------------|------------------------|----------------------|------------|-----------|-------------|-----------|-----------|---------------------|----------|----------|-----------|-------------|
|                          | Hear<br>t                    | Live<br>r | Splee<br>n | Stomac<br>h | Lun<br>g | Kidne<br>y | Bladde<br>r | Gall<br>bladde<br>r | Peri-<br>cardiu<br>m | Large<br>intestin<br>e | Sour                 | Bitte<br>r | Swee<br>t | Pungen<br>t | Salt<br>y | Blan<br>d | Neutra<br>l         | War<br>m | Col<br>d |           |             |
| Gan cao                  | 1                            |           | 1          | 1           | 1        |            |             |                     |                      |                        |                      | 1          |           |             |           | 1         |                     |          |          |           | 875         |
| Sheng jiang <sup>2</sup> |                              |           | 1          | 1           | 1        |            |             |                     |                      |                        |                      |            | 1         |             |           |           | 1                   |          |          |           | 229<br>9    |
| Gan jiang                | 1                            |           | 1          | 1           | 1        |            |             |                     |                      |                        |                      |            | 1         |             |           |           |                     |          |          | 1         | 230<br>6    |
| Dang gui                 | 1                            | 1         | 1          |             |          |            |             |                     |                      |                        | 1                    | 1          | 1         |             |           |           | 1                   |          |          |           | 134<br>9    |
| Bai shao <sup>3</sup>    |                              | 1         | 1          |             |          |            |             |                     |                      | 1                      | 1                    |            |           |             |           |           |                     | 1        |          |           | 649         |
| Chi shao                 |                              | 1         | 1          |             |          |            |             |                     |                      |                        | 1                    |            |           |             |           |           |                     | 1        |          |           | 659         |
| Fang feng                |                              | 1         | 1          |             | 1        |            | 1           |                     |                      |                        |                      | 1          | 1         |             |           |           | 1                   |          |          |           | 142<br>3    |
| Gui zhi                  | 1                            |           |            |             | 1        |            | 1           |                     |                      |                        |                      | 1          | 1         |             |           |           | 1                   |          |          |           | 464         |
| Ma huang                 |                              |           |            |             | 1        |            | 1           |                     |                      |                        |                      | 1          | 1         |             |           |           | 1                   |          |          |           | 274         |
| Bai zhu                  |                              |           | 1          | 1           |          |            |             |                     |                      |                        |                      | 1          | 1         |             |           |           | 1                   |          |          |           | 189<br>7    |
| Chuan xiong              |                              | 1         |            |             |          |            |             | 1                   | 1                    |                        |                      |            | 1         |             |           |           | 1                   |          |          |           | 140<br>2    |
| Fu ling                  | 1                            |           | 1          |             | 1        | 1          |             |                     |                      |                        |                      | 1          |           |             | 1         | 1         |                     |          |          |           | 189         |
| Huai niu xi              |                              | 1         |            |             |          | 1          |             |                     |                      |                        | 1                    | 1          |           |             |           | 1         |                     |          |          |           | 405         |
| Chuan wu                 | 1                            | 1         | 1          |             |          | 1          |             |                     |                      |                        |                      | 1          | 1         |             |           |           |                     |          |          | 1         | 479         |
| Huang qi                 |                              |           | 1          |             | 1        |            |             |                     |                      |                        |                      | 1          |           |             |           |           | 1                   |          |          |           | 825         |
| Fang ji                  |                              |           | 1          |             | 1        |            | 1           |                     |                      |                        |                      | 1          | 1         |             |           |           |                     | 1        |          |           | 589         |
| Ren shen                 | 1                            |           | 1          |             | 1        | 1          |             |                     |                      |                        |                      | 1          | 1         |             |           | 1         |                     |          |          |           | 128<br>1    |
| Cang zhu                 |                              | 1         | 1          | 1           |          |            |             |                     |                      |                        |                      | 1          | 1         |             |           |           | 1                   |          |          |           | 188<br>9    |
| Bai zhi                  |                              |           | 1          | 1           | 1        |            |             |                     |                      |                        |                      |            | 1         |             |           |           | 1                   |          |          |           | 133<br>2    |
| Fu zi                    | 1                            |           | 1          |             |          | 1          |             |                     |                      |                        |                      | 1          | 1         |             |           |           |                     |          |          | 1         | 587         |
| Du huo                   |                              |           |            |             |          | 1          | 1           |                     |                      |                        |                      | 1          | 1         |             |           |           | 1                   |          |          |           | 133<br>8    |
| Huang qin                | 1                            | 1         |            |             | 1        |            |             | 1                   |                      | 1                      |                      | 1          |           |             |           |           |                     | 1        |          |           | 168<br>9    |



|                                            |    |    |    |   |    |    |   |   |   |   |   |    |    |    |   |   |   |    |   |   |      |
|--------------------------------------------|----|----|----|---|----|----|---|---|---|---|---|----|----|----|---|---|---|----|---|---|------|
| Chen pi                                    |    |    | 1  | 1 | 1  |    |   |   |   |   |   | 1  |    | 1  |   |   |   | 1  |   |   | 1004 |
| Tao ren                                    | 1  | 1  |    |   |    |    |   |   |   | 1 |   | 1  | 1  |    |   |   |   | 1  |   |   | 741  |
| Sheng di huang (gan di huang) <sup>4</sup> | 1  | 1  |    |   |    | 1  |   |   |   |   |   | 1  | 1  |    |   |   |   |    | 1 |   | 1740 |
| Shu di huang                               |    | 1  |    |   |    | 1  |   |   |   |   |   |    | 1  |    |   |   |   |    | 1 |   | 1745 |
| Rou gui                                    | 1  | 1  | 1  |   |    | 1  |   |   |   |   |   |    | 1  | 1  |   |   |   |    |   | 1 | 458  |
| Qin jiao                                   |    | 1  |    | 1 |    |    |   | 1 |   |   |   | 1  |    | 1  |   |   |   |    | 1 |   | 1486 |
| Huang bai                                  |    |    |    |   |    | 1  | 1 |   |   | 1 |   | 1  |    |    |   |   |   |    | 1 |   | 1044 |
| Wei ling xian                              |    | 1  |    |   |    |    | 1 |   |   |   |   | 1  |    | 1  | 1 |   |   |    | 1 |   | 522  |
| Total                                      | 12 | 15 | 18 | 8 | 13 | 10 | 7 | 3 | 1 | 3 | 2 | 18 | 13 | 17 | 1 | 1 | 5 | 14 | 7 | 4 |      |

Note: 1. Names are in pinyin, see glossary for scientific names; 2. Paeony is in two forms – white (bai shao) and red (chi shao); 3. Ginger is in two forms - fresh (sheng jiang) and dried (gan jiang); 4. Rehmannia is in two forms – unprocessed (sheng di huang, also called gan di huang) and steamed (shu di huang); 5. There are minor variations between sources in the channel tropism, flavour and nature of some herbs. These properties are all according to Zhong Hua Ben Cao.

## Reference

1. State Administration of Traditional Chinese Medicine 'Chinese Materia Medica Committee', ed *Zhong Hua Ben Cao: Jing Xuan Ben 'Chinese Materia Medica: abridged version'*. Shanghai: Shanghai Scientific and Technical Publishers; 1998.
